# Supplementary material for: An optimised small-scale sample preparation workflow for historical dye analysis using UHPLC-PDA applied to Scottish and English Renaissance embroidery
Source: Royal Society of Chemistry journal article supplement (doi:10.1039/d1ay01151k), 2021-01-01
Supplement: d1ay01151k2.pdf [file d1ay01151k2.pdf]

## ESI: UHPLC method

Retention time (n = 6)

| Chromophore | Retention time (min) | std dev (min) |
|-------------|----------------------|---------------|
| Fisetin     | 3.714                | 0.012         |
| Sulfuretin  | 4.420                | 0.012         |
| Luteolin    | 4.787                | 0.013         |
| Genistein   | 4.919                | 0.011         |
| Apigenin    | 5.462                | 0.012         |
| Chrysoeriol | 5.622                | 0.011         |
| Diosmetin   | 5.685                | 0.010         |
| Alizarin    | 6.287                | 0.010         |
| Prunetin    | 6.738                | 0.009         |

Equation, calculated slope error and R<sup>2</sup> values of the calibration curves (Peak Height (AU) vs Concentration (µg ml<sup>-1</sup>), (7 concentrations used, n = 5)

| Chromophore | Equation    | slope std error | R <sup>2</sup> value |
|-------------|-------------|-----------------|----------------------|
| Fisetin     | y = 0.0143x | 3.51E-04        | 0.9958               |
| Sulfuretin  | y = 0.0124x | 8.84E-05        | 0.9997               |
| Luteolin    | y = 0.0226x | 1.95E-04        | 0.9995               |
| Genistein   | y = 0.0460x | 1.71E-04        | 0.9999               |
| Apigenin    | y = 0.0121x | 7.60E-04        | 0.9729               |
| Chrysoeriol | y = 0.0148x | 1.06E-03        | 0.9653               |
| Diosmetin   | y = 0.0203x | 4.93E-05        | 0.9999               |
| Alizarin    | y = 0.0328x | 9.98E-04        | 0.9935               |
| Prunetin    | y = 0.0278x | 1.33E-03        | 0.9842               |

Average signal (peak height) of retention time  $\pm$  0.25 min in blank runs (n = 3) used as noise in LoD and LoQ calculations.

| <b>Chromophore</b> | <b>Peak height</b> | <b>std dev</b> |
|--------------------|--------------------|----------------|
| <b>Fisetin</b>     | 1.25E-03           | 2.24E-05       |
| <b>Sulfuretin</b>  | 1.50E-03           | 4.94E-05       |
| <b>Luteolin</b>    | 1.46E-03           | 4.55E-05       |
| <b>Genistein</b>   | 1.48E-03           | 4.34E-05       |
| <b>Apigenin</b>    | 1.61E-03           | 3.44E-05       |
| <b>Chrysoeriol</b> | 1.67E-03           | 3.64E-05       |
| <b>Diosmetin</b>   | 1.69E-03           | 3.70E-05       |
| <b>Alizarin</b>    | 1.92E-03           | 9.16E-05       |
| <b>Prunetin</b>    | 2.29E-03           | 8.99E-05       |

Limit of detection (LoD) and limit of quantification (LoQ) calculated using the signal-to-noise method

| <b>Chromophore</b> | <b>LoD (<math>\mu\text{g ml}^{-1}</math>)</b> | <b>std dev</b> | <b>LoQ (<math>\mu\text{g ml}^{-1}</math>)</b> | <b>std dev</b> |
|--------------------|-----------------------------------------------|----------------|-----------------------------------------------|----------------|
| <b>Fisetin</b>     | 0.29                                          | 0.03           | 0.88                                          | 0.03           |
| <b>Sulfuretin</b>  | 0.40                                          | 0.03           | 1.21                                          | 0.03           |
| <b>Luteolin</b>    | 0.21                                          | 0.03           | 0.65                                          | 0.03           |
| <b>Genistein</b>   | 0.11                                          | 0.03           | 0.32                                          | 0.03           |
| <b>Apigenin</b>    | 0.44                                          | 0.07           | 1.33                                          | 0.07           |
| <b>Chrysoeriol</b> | 0.37                                          | 0.07           | 1.13                                          | 0.07           |
| <b>Diosmetin</b>   | 0.27                                          | 0.02           | 0.83                                          | 0.02           |
| <b>Alizarin</b>    | 0.19                                          | 0.06           | 0.59                                          | 0.06           |
| <b>Prunetin</b>    | 0.27                                          | 0.06           | 0.83                                          | 0.06           |

### ESI: Figure 3

| Chromophore        | 20 µg ml <sup>-1</sup> |         | 10 µg ml <sup>-1</sup> |         | 5 µg ml <sup>-1</sup> |         | 2.5 µg ml <sup>-1</sup> |         | 1 µg ml <sup>-1</sup> |         | 0.5 µg ml <sup>-1</sup> |         | 0.1 µg ml <sup>-1</sup> |         |
|--------------------|------------------------|---------|------------------------|---------|-----------------------|---------|-------------------------|---------|-----------------------|---------|-------------------------|---------|-------------------------|---------|
|                    | % Recovery             | std dev | % Recovery             | std dev | % Recovery            | std dev | % Recovery              | std dev | % Recovery            | std dev | % Recovery              | std dev | % Recovery              | std dev |
| <b>Fisetin</b>     | 93.10                  | 4.17    | 96.08                  | 6.07    | 96.50                 | 9.47    | 97.22                   | 8.79    | 87.83                 | 6.96    | 99.71                   | 13.04   | 87.21                   | 17.65   |
| <b>Sulfuretin</b>  | 94.90                  | 4.37    | 96.57                  | 6.95    | 97.29                 | 6.87    | 100.11                  | 4.57    | 86.25                 | 7.15    | 87.74                   | 4.77    | 103.29                  | 17.33   |
| <b>Luteolin</b>    | 95.83                  | 5.18    | 97.76                  | 6.39    | 97.77                 | 6.42    | 97.57                   | 6.49    | 87.39                 | 6.37    | 90.11                   | 5.93    | 102.86                  | 13.19   |
| <b>Genistein</b>   | 94.64                  | 6.40    | 95.24                  | 6.17    | 98.93                 | 6.70    | 101.27                  | 6.71    | 86.56                 | 6.95    | 91.64                   | 7.77    | 106.16                  | 17.38   |
| <b>Apigenin</b>    | 91.41                  | 8.26    | 97.63                  | 6.73    | 98.54                 | 6.80    | 100.38                  | 7.24    | 89.40                 | 6.87    | 89.47                   | 8.16    | 100.26                  | 14.38   |
| <b>Chrysoeriol</b> | 97.67                  | 8.63    | 96.00                  | 8.85    | 99.35                 | 7.80    | 100.09                  | 8.00    | 87.11                 | 6.58    | 86.62                   | 6.44    | 103.50                  | 15.06   |
| <b>Diosmetin</b>   | 98.14                  | 7.95    | 98.36                  | 6.86    | 97.26                 | 6.32    | 96.93                   | 7.11    | 85.56                 | 7.26    | 88.44                   | 3.75    | 106.66                  | 18.06   |
| <b>Alizarin</b>    | 92.17                  | 7.90    | 96.33                  | 5.06    | 90.08                 | 9.35    | 89.52                   | 9.87    | 85.06                 | 8.66    | 90.67                   | 12.42   | 79.77                   | 28.38   |
| <b>Prunetin</b>    | 97.98                  | 12.54   | 88.77                  | 12.68   | 108.20                | 17.08   | 111.70                  | 17.13   | 94.48                 | 8.35    | 92.95                   | 9.97    | 108.86                  | 19.63   |

Figure 3, left: Average percentage recoveries of the filtration step for all tested concentrations (n = 5).

| Chromophore        | Equation    | slope std error (n = 5) |
|--------------------|-------------|-------------------------|
| <b>Fisetin</b>     | y = 0.9405x | 0.0140                  |
| <b>Sulfuretin</b>  | y = 0.9306x | 0.0193                  |
| <b>Luteolin</b>    | y = 0.9449x | 0.0168                  |
| <b>Genistein</b>   | y = 0.9452x | 0.0165                  |
| <b>Apigenin</b>    | y = 0.9469x | 0.0175                  |
| <b>Chrysoeriol</b> | y = 0.9473x | 0.0224                  |
| <b>Diosmetin</b>   | y = 0.9236x | 0.0203                  |
| <b>Alizarin</b>    | y = 0.9144x | 0.0171                  |
| <b>Prunetin</b>    | y = 0.9998x | 0.0313                  |

Figure 3, middle: Equation and calculated slope error (n = 5) for the Peak Area<sub>unfiltered</sub> vs Peak Area<sub>filtered</sub> graphs.

Figure 3, right: Average Peak Area of the reconstitution solvents for all chromophores using reconstitution volume of 25  $\mu$ l (n = 3)

| Chromophore        | DMSO      |         | 10 % DMSO |         | MeOH:H <sub>2</sub> O 1:1 v/v |         | 0.1 % FA  |         | Control   |         |
|--------------------|-----------|---------|-----------|---------|-------------------------------|---------|-----------|---------|-----------|---------|
|                    | Peak Area | std dev | Peak Area | std dev | Peak Area                     | std dev | Peak Area | std dev | Peak Area | std dev |
| <b>Fisetin</b>     | 584956    | 21910   | 740851    | 19413   | 646132                        | 2321    | 813981    | 21781   | 322012    | 3870    |
| <b>Sulfuretin</b>  | 474759    | 18653   | 601883    | 21878   | 535500                        | 2609    | 667076    | 17748   | 258619    | 3111    |
| <b>Luteolin</b>    | 910957    | 33087   | 1079223   | 42854   | 982944                        | 8686    | 1237990   | 34310   | 478773    | 6975    |
| <b>Genistein</b>   | 1760157   | 49858   | 2059121   | 81172   | 1945549                       | 13517   | 2416550   | 63178   | 924830    | 12426   |
| <b>Apigenin</b>    | 649227    | 25129   | 591372    | 7930    | 497595                        | 12373   | 618152    | 15205   | 302260    | 9060    |
| <b>Chrysoeriol</b> | 789194    | 30867   | 595086    | 914     | 537781                        | 7445    | 644735    | 13489   | 274915    | 5522    |
| <b>Diosmetin</b>   | 821619    | 31000   | 1033167   | 55532   | 850510                        | 14048   | 1010157   | 26199   | 444557    | 8377    |
| <b>Alizarin</b>    | 1391289   | 51705   | 1827053   | 79932   | 1526886                       | 9881    | 1920672   | 51500   | 747887    | 6731    |
| <b>Prunetin</b>    | 1448874   | 18871   | 1114907   | 51880   | 1061709                       | 6358    | 1207820   | 25844   | 611611    | 19195   |

Figure 3, right: Average Peak Area of the reconstitution solvents for all chromophores using reconstitution volume of 50  $\mu$ l (n = 3)

| Chromophore        | DMSO      |         | 10 % DMSO |         | MeOH:H <sub>2</sub> O 1:1 v/v |         | 0.1 % FA  |         | Control   |         |
|--------------------|-----------|---------|-----------|---------|-------------------------------|---------|-----------|---------|-----------|---------|
|                    | Peak Area | std dev | Peak Area | std dev | Peak Area                     | std dev | Peak Area | std dev | Peak Area | std dev |
| <b>Fisetin</b>     | 268308    | 20272   | 301611    | 1647    | 314650                        | 6521    | 383581    | 8149    | 322012    | 3870    |
| <b>Sulfuretin</b>  | 234928    | 3873    | 254295    | 832     | 263701                        | 5004    | 320314    | 6207    | 258619    | 3111    |
| <b>Luteolin</b>    | 458603    | 13610   | 476975    | 1417    | 491980                        | 6924    | 594654    | 12891   | 478773    | 6975    |
| <b>Genistein</b>   | 860323    | 15962   | 952866    | 2356    | 986156                        | 15996   | 1173186   | 24731   | 924830    | 12426   |
| <b>Apigenin</b>    | 318031    | 4897    | 321043    | 2818    | 275524                        | 10245   | 299474    | 6020    | 302260    | 9060    |
| <b>Chrysoeriol</b> | 511751    | 16059   | 358602    | 3640    | 276197                        | 3468    | 316876    | 6894    | 274915    | 5522    |
| <b>Diosmetin</b>   | 288485    | 4546    | 439253    | 1063    | 441505                        | 5945    | 504929    | 11750   | 444557    | 8377    |
| <b>Alizarin</b>    | 706257    | 13721   | 737333    | 1716    | 766978                        | 13122   | 927362    | 18622   | 747887    | 6731    |

---

|                 |        |       |        |       |        |       |        |       |        |       |
|-----------------|--------|-------|--------|-------|--------|-------|--------|-------|--------|-------|
| <b>Prunetin</b> | 735502 | 23671 | 645643 | 11944 | 544794 | 10067 | 604329 | 14086 | 611611 | 19195 |
|-----------------|--------|-------|--------|-------|--------|-------|--------|-------|--------|-------|

---
